# Supplementary material for: Insights into the Host Specificity of Mosquito-Borne Flaviviruses Infecting Wild Mammals
Source: Springer Nature journal article supplement (doi:10.1007/s10393-019-01442-2), 2019-10-29
Supplement: MOESM3 [file 17326794]

#NEXUS
[R-package APE, Wed Jun 28 04:58:31 2017]

BEGIN TAXA;
	DIMENSIONS NTAX = 43;
	TAXLABELS
		Ntaya virus
		Bagaza virus
		Tembusu virus
		West Nile virus2
		West Nile virus1
		Usutu virus
		Murray Valley encephalitis virus
		Japanese encephalitis virus
		St. Louis encephalitis virus
		Ilheus virus
		Kedougou virus
		Zika virus
		Kokobera virus
		Aroa virus
		Dengue virus 2
		Dengue virus 3
		Dengue virus 1
		Dengue virus 4
		Donggang virus
		Chaoyang virus
		Wesselsbron virus
		Sepik virus
		Yellow fever virus
		Entebbe bat virus
		Yokose virus
		Karshi virus
		Omsk hemorrhagic fever virus
		Louping ill virus
		Tick-borne encephalitis virus
		Langat virus
		Alkhumra hemorrhagic fever virus
		Powassan virus
		Montana myotis leukoencephalitis virus
		Rio Bravo virus
		Modoc virus
		Apoi virus
		Mosquito flavivirus
		Quang Binh virus
		Culex flavivirus
		Aedes flavivirus
		Kamiti River virus
		Cell fusing agent virus
		Tamana bat virus
	;
END;
BEGIN TREES;
	TRANSLATE
		1	Ntaya virus,
		2	Bagaza virus,
		3	Tembusu virus,
		4	West Nile virus2,
		5	West Nile virus1,
		6	Usutu virus,
		7	Murray Valley encephalitis virus,
		8	Japanese encephalitis virus,
		9	St. Louis encephalitis virus,
		10	Ilheus virus,
		11	Kedougou virus,
		12	Zika virus,
		13	Kokobera virus,
		14	Aroa virus,
		15	Dengue virus 2,
		16	Dengue virus 3,
		17	Dengue virus 1,
		18	Dengue virus 4,
		19	Donggang virus,
		20	Chaoyang virus,
		21	Wesselsbron virus,
		22	Sepik virus,
		23	Yellow fever virus,
		24	Entebbe bat virus,
		25	Yokose virus,
		26	Karshi virus,
		27	Omsk hemorrhagic fever virus,
		28	Louping ill virus,
		29	Tick-borne encephalitis virus,
		30	Langat virus,
		31	Alkhumra hemorrhagic fever virus,
		32	Powassan virus,
		33	Montana myotis leukoencephalitis virus,
		34	Rio Bravo virus,
		35	Modoc virus,
		36	Apoi virus,
		37	Mosquito flavivirus,
		38	Quang Binh virus,
		39	Culex flavivirus,
		40	Aedes flavivirus,
		41	Kamiti River virus,
		42	Cell fusing agent virus,
		43	Tamana bat virus
	;
	TREE * UNTITLED = [&R] (43:2.741104,(((((((((1:0.1668577,2:0.1668577):0.1204991,3:0.2873568):0.2584291,(((4:0.1694737,5:0.1694737):0.1892949,((6:0.2053444,7:0.2053444):0.06295461,8:0.268299):0.09046958):0.1394222,(9:0.402895,10:0.402895):0.09529583):0.04759501):0.1702044,(13:0.587153,14:0.587153):0.1288373):0.05616349,((11:0.5581238,12:0.5581238):0.1321632,((15:0.3230473,(16:0.2179391,17:0.2179391):0.1051082):0.07740841,18:0.4004557):0.2898313):0.08186676):0.1703802,(19:0.4482307,20:0.4482307):0.4943032):0.1921445,(((21:0.1999856,22:0.1999856):0.3436445,23:0.5436301):0.3207879,(24:0.3648113,25:0.3648113):0.4996067):0.2702605):0.1970175,((26:0.4916077,((((27:0.152953,(28:0.07671862,29:0.07671862):0.07623439):0.08211528,30:0.2350683):0.07118236,31:0.3062507):0.07237382,32:0.3786245):0.1129832):0.6283513,(((33:0.3874002,34:0.3874002):0.1489424,35:0.5363426):0.1596064,36:0.695949):0.42401):0.2117369):0.7737027,(((37:0.133259,38:0.133259):0.239371,39:0.37263):0.5295394,((40:0.2484252,41:0.2484252):0.1449303,42:0.3933555):0.5088139):1.203229):0.6357056);
END;
